# Supplementary material for: Thermally-Induced Shape-Memory Behavior of Degradable Gelatin-Based Networks
Source: Preprints.org preprint supplement (doi:10.20944/preprints202105.0510.v1), 2021-05-21
Supplement: Supplementary file 1 [file supplementary]

Archive with 2 entries (2 files):
- Supp Info_SMP gelatine.pdf
- Supporting Video S1 - shape recovery of SM-Gelatin.mp4
