# Supplementary material for: Thermally-Induced Shape-Memory Behavior of Degradable Gelatin-Based Networks
Source: Preprints.org preprint supplement (doi:10.20944/preprints202105.0510.v1), 2021-05-21
Supplement: Supplementary file 1 [file supplementary › Supp Info_SMP gelatine.pdf]

# Thermally Induced Shape-Memory Behavior of Degradable Gelatin-Based Networks

by Axel T. Neffe<sup>1</sup>, Candy Löwenberg<sup>1</sup>, Konstanze K. Julich-Gruner<sup>1</sup>, Marc Behl<sup>1</sup>, and Andreas Lendlein<sup>1,2</sup>

1: Institute of Active Polymers and Berlin-Brandenburg Center of Regenerative Therapies, Helmholtz-Zentrum Hereon, 14513 Teltow, Germany

2: Institute of Chemistry, University of Potsdam, 14476 Potsdam, Germany

**Table S1.** Gel content (G) and volumetric degree of swelling (Q) at defined temperatures for different hydrogel compositions.

| <i>Sample ID<sup>a</sup></i> | <i>G</i><br>[wt%] | <i>Q</i> 4 °C<br>[vol%] | <i>Q</i> 37 °C<br>[vol%] | <i>Q</i> 55 °C<br>[vol%] |
|------------------------------|-------------------|-------------------------|--------------------------|--------------------------|
| G20_OEG1000(0.75)            | 86 ± 2            | 1180 ± 80               | 1110 ± 80                | 1030 ± 60                |
| G20_OEG1000(1)               | 89 ± 2            | 1080 ± 30               | 1010 ± 50                | 940 ± 50                 |
| G20_OEG1000(2)               | 83 ± 2            | 1630 ± 90               | 1610 ± 120               | 1620 ± 30                |
| G20_OEG1000(3)               | 71 ± 4            | 3050 ± 210              | 3050 ± 360               | 2680 ± 30                |
| G20_OEG1500(0.75)            | 86 ± 1            | 1270 ± 90               | 1290 ± 80                | 1210 ± 60                |
| G20_OEG1500(1)               | 87 ± 1            | 1260 ± 40               | 1290 ± 30                | 1250 ± 90                |
| G20_OEG1500(2)               | 82 ± 2            | 1690 ± 70               | 1730 ± 70                | 1700 ± 80                |
| G20_OEG1500(3)               | 77 ± 3            | 2950 ± 70               | 2960 ± 60                | 2950 ± 80                |
| G20_OEG3400(0.75)            | 86 ± 1            | 1340 ± 40               | 1280 ± 40                | 1290 ± 130               |
| G20_OEG3400(1)               | 81 ± 1            | 1620 ± 70               | 1630 ± 120               | 1640 ± 170               |
| G20_OEG3400(2)               | 72 ± 2            | 2410 ± 150              | 2390 ± 200               | 2400 ± 130               |
| G20_OEG3400(3)               | 42 ± 8            | 2890 ± 100              | 2970 ± 160               | 2900 ± 160               |

a: nomenclature: G20\_OEG<sub>y</sub>(*z*), with G20 = 20 wt% concentration of gelatin in the crosslinking step, *y* = number average molar mass *M<sub>n</sub>* of the OEG crosslinkers and *z* the thiol:methacrylate molar ratio.

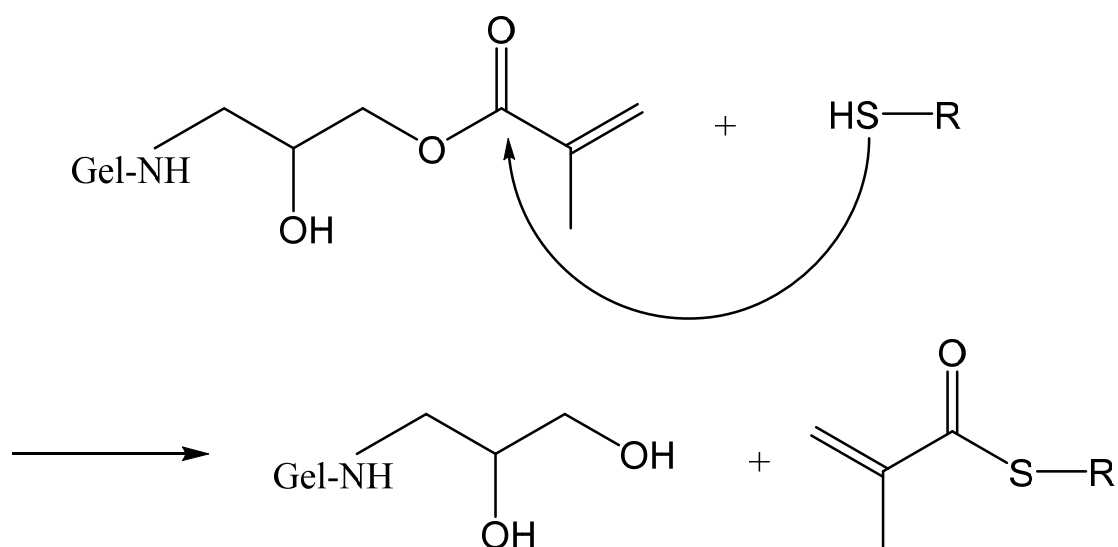

**Figure S1.** Thioester formation by reaction of a thiol with a glycidylmethacrylate group on GMA-gelatin as side reaction increasing in importance with increasing amount of thiols.

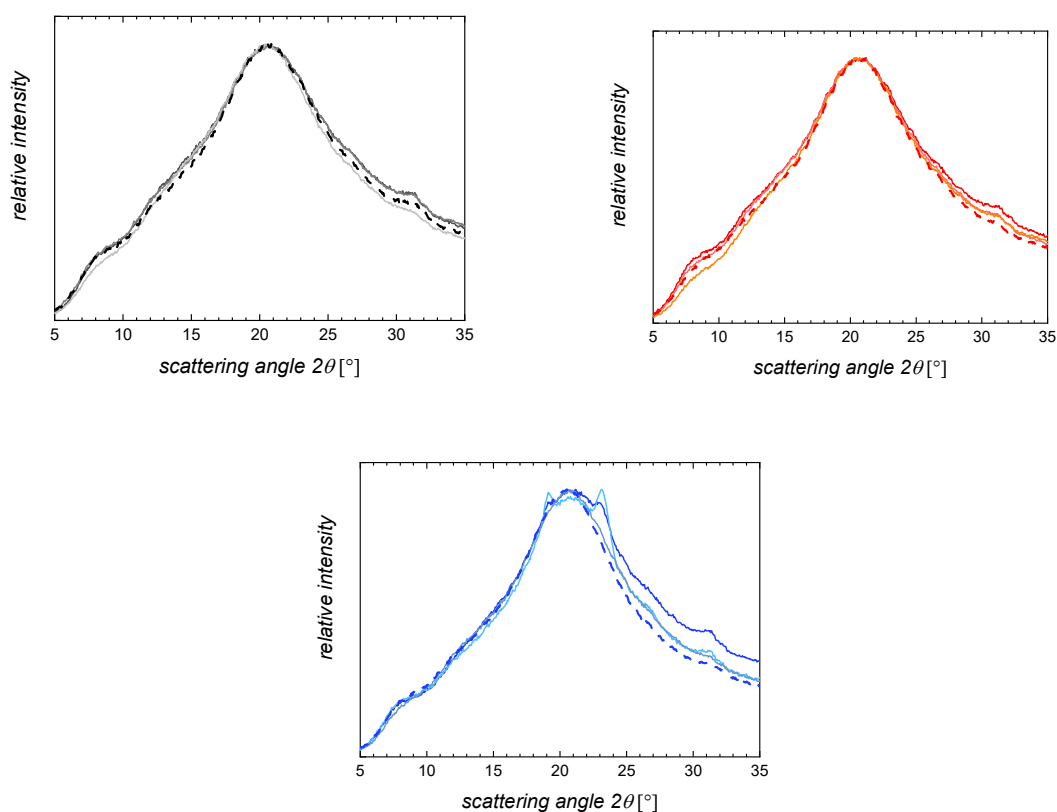

**Figure S2.** WAXS spectra of (A) G20\_OEG1000( $z$ ), (B) G20\_OEG1500( $z$ ), and (C) G20\_OEG3400( $z$ ) networks.  $z = 0.75$  (— — —), 1 (— — —), 2 (— — —), and 3 (— — —).

**Table S2.** Calculated values for relative triple helix content ( $X_{TH}$ ) and relative single helix content ( $X_{SH}$ ), as determined by means of WAXS measurements.

| Sample ID <sup>a</sup> | $X_{TH}$<br>[%] | $X_{SH}$<br>[%] |
|------------------------|-----------------|-----------------|
| G20_OEG1000(0.75)      | $4.6 \pm 0.2$   | $1.0 \pm 0.1$   |
| G20_OEG1000(1)         | $3.9 \pm 0.1$   | $0.9 \pm 0.1$   |
| G20_OEG1000(2)         | $4.4 \pm 0.2$   | $1.0 \pm 0.1$   |
| G20_OEG1000(3)         | $4.3 \pm 0.2$   | $1.0 \pm 0.1$   |
| G20_OEG1500(0.75)      | $4.5 \pm 0.2$   | $1.1 \pm 0.1$   |
| G20_OEG1500(1)         | $4.0 \pm 0.3$   | $0.9 \pm 0.1$   |
| G20_OEG1500(2)         | $4.4 \pm 0.1$   | $1.1 \pm 0.1$   |
| G20_OEG1500(3)         | $4.5 \pm 0.1$   | $1.1 \pm 0.1$   |
| G20_OEG3400(0.75)      | $6.1 \pm 0.2$   | $1.5 \pm 0.1$   |
| G20_OEG3400(1)         | $5.6 \pm 0.3$   | $1.4 \pm 0.1$   |
| G20_OEG3400(2)         | $5.8 \pm 0.3$   | $1.4 \pm 0.1$   |
| G20_OEG3400(3)         | $6.0 \pm 0.5$   | $1.5 \pm 0.1$   |

a: nomenclature: G20\_OEG $y(z)$ , with G20 = 20 wt% concentration of gelatin in the crosslinking step,  $y$  = number average molar mass  $M_n$  of the OEG crosslinkers and  $z$  the thiol:methacrylate molar ratio.

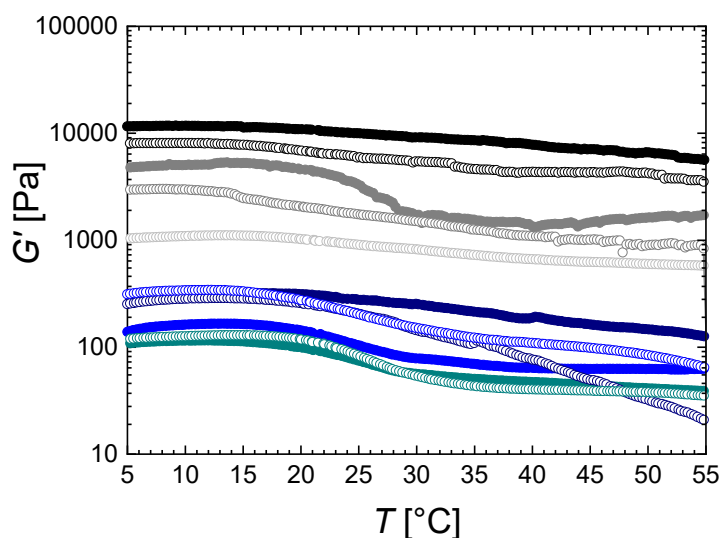

**Figure S3.** Rheological behavior of G20\_OEG1500(1) hydrogels after 1(-●-), 1.5(-○-), 2(-●-), 2.5(-○-), 3.5 (-○-), 4 (-●-), 4.5 (-○-), 5 (-●-), 5.5 (-○-), 6.5 (-●-), and 6.5 (-○-) days of hydrolytic degradation at 37 °C at pH = 7.4.

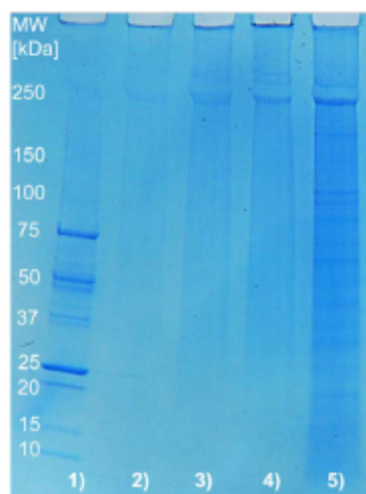

**Figure S4.** SDS-PAGE of the molar masses of the degradation products at  $t = 8$  d: 1) standard, 2) G20\_OEG1000(1), 3) G20\_OEG1500(1), 4) G20\_OEG3400(1). No larger gelatin fragments are observed, which suggests that hydrolysis primarily starts at the attached ester groups.

#### SDS-PAGE (experimental details)

The determination of molar mass distribution of gelatin samples was carried out by SDS-PAGE in a Mini-Protean system (Bio-Rad, Feldkirchen, Germany), using 4-20% Ready Gels (Bio-Rad Laboratories, Feldkirchen, Germany). For the determination of the molar mass, a pre-stained SDS-PAGE standard was used. Gelatin samples were dissolved in distilled water at a concentration of 2 or 3 mg/mL. All samples were diluted 1:1 with a Laemmli sample buffer, containing 62.5 mM Tris-HCl, pH 6.8, 25% (w/v) glycerol, 2% SDS, 0.01% bromophenol blue, and 5% (w/v) 2-mercaptoethanol, followed by a heating to 90 °C for 5 min. Afterwards the samples were immediately cooled down to 25 °C. Then, 15  $\mu$ L of each sample were loaded onto their respective lane in the gel and a current of 120 V was applied for approximately 45 min in running buffer (1L 10X buffer prepared with: 30.2 g Tris base, 144 g glycine, 10 g SDS). The protein bands were visualized after a 60 min staining (0.1 wt% comassie blue, 10 vol% acetic acid and 40 vol% methanol in water) and 60 min treatment in a destaining solution (10 vol% glacial acetic acid, 20 vol% methanol in water). The molar mass of the gelatin fragments was approximated by measuring the relative mobility of the standard protein molecular weight markers.

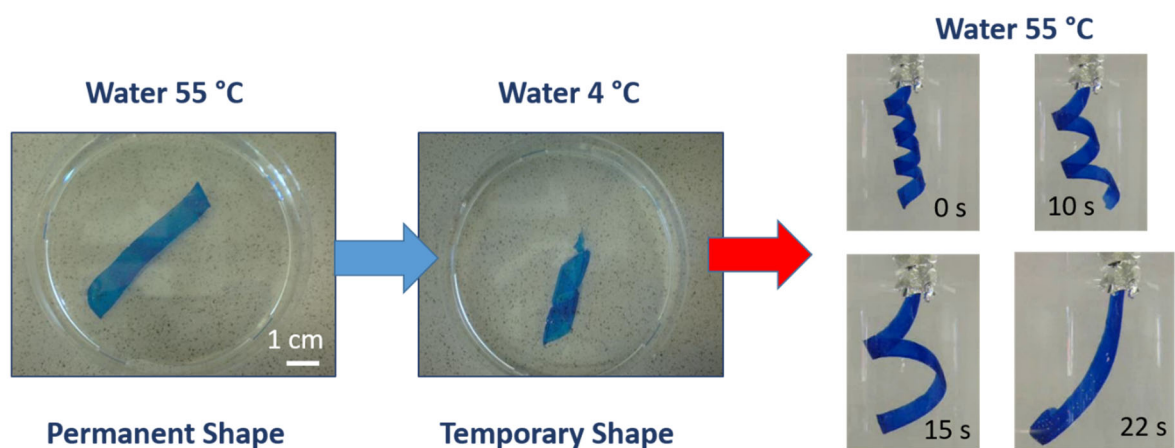

**Figure S5.** Programming results in a helix as temporary shape; the original shape was recovered at 55 °C. For better visualization of the effect, the hydrogel stripes were stained with Coomassie blue, as original hydrogel appear to be transparent.

**Video S1.** Shape recovery of a sample at 55 °C programmed as helix (compare Fig. S5).
